# Supplementary material
Source: publisher figshare collection journal article supplement (https://acs.figshare.com/ndownloader/files/3836701)
Supplement: Supplementary file 1 [file 3836701]

# Nanoparticle Capping Agent Dynamics and Electron Transfer: Polymer Gated Oxidation of Silver Nanoparticles– Supporting Information

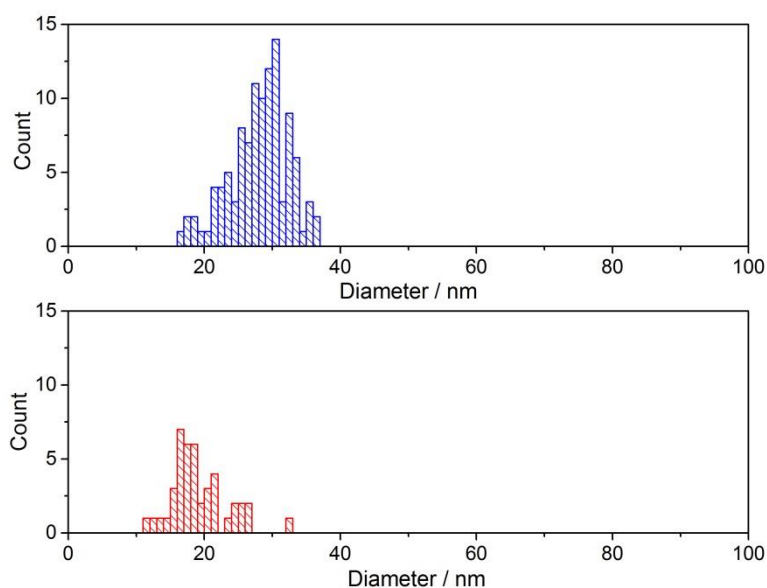

**Figure S1. Histogram from TEM sizing of citrate capped silver nanoparticles (n = 109) blue, and PEG capped silver nanoparticles (n = 43)**

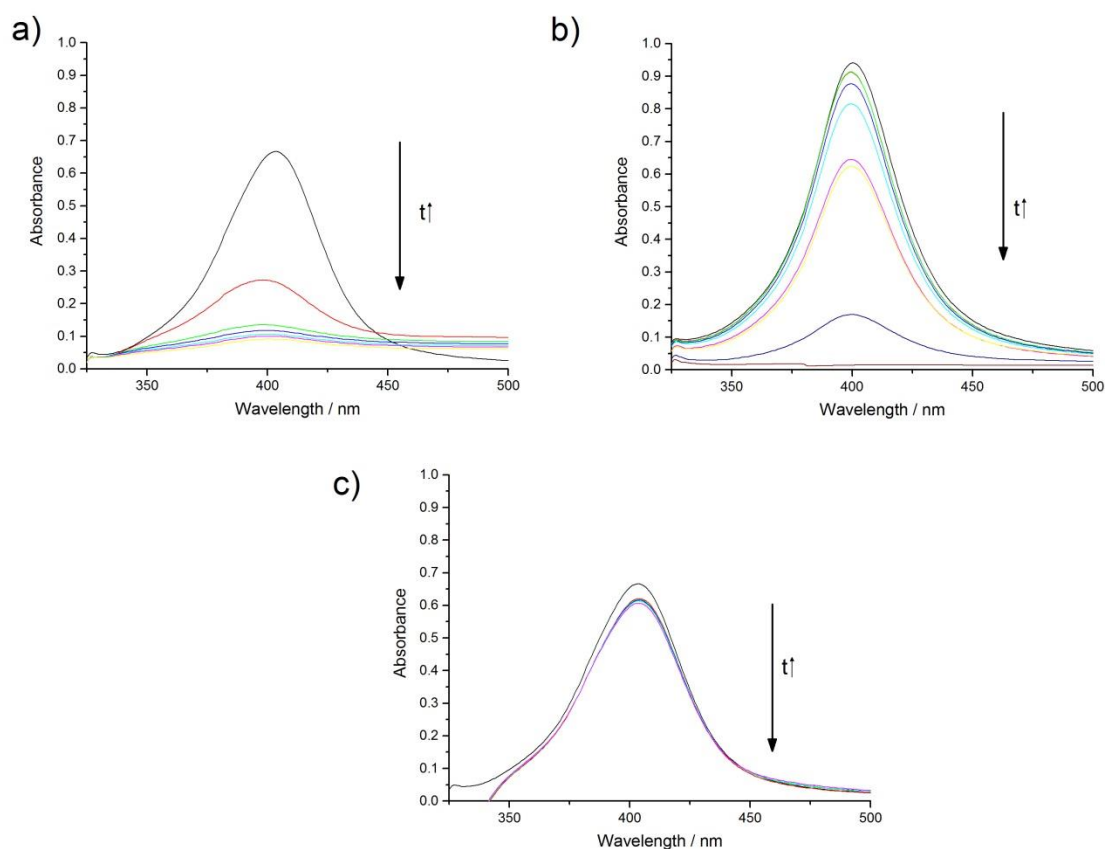

**Figure S2. UV-Vis spectra of a) citrate capped Ag NPs in 20 mM nitric acid (black is the absence of acid, red is 5 minutes post acid addition, green 10 mins, navy is 20, nyan is 30 minutes and yellow is 60 minutes post addition) b) PEG capped Ag NPs in 20 mM nitric acid (black is in the absence of acid, red is 15 minutes post addition, green 30 mins, navy is 60, nyan is 180 minutes, navy is after 24 hours and brown is 5 days) and c) citrate capped Ag NPs in 20 mM sodium nitrate (black is in the absence of acid, red is 10 minutes post addition, green 20 mins, navy is 30 and nyan is 60 minutes).**

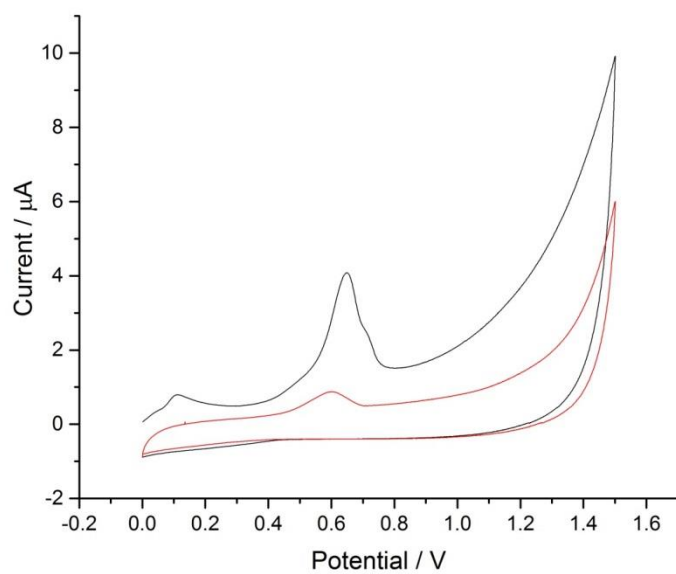

**Figure S3.** CV of Ag PEG NPs dropcast on a glassy carbon electrode in RTIL: first scan (black) and second scan (red).
